# Supplementary material
Source: publisher site journal article supplement (https://www.dovepress.com/article/226293)
Supplement: Supplementary file 1 [file get_supplementary_file.php]

Supplementary Information

Protein encapsulation of experimental anticancer agents 5F 203 and Phortress: towards precision drug delivery.

SI1 Encapsulation methods

Encapsulation of 5F 203 was performed using the nanoreactor and reassembly routes (Figure S1). In the nanoreactor route, molecules are encapsulated by passive diffusion via 3 and 4 Angstrom channels in the AFt shell. In the reassembly route, the ability of the AFt cage to disassemble into its subunits and reassemble are used to entrap the cargo. Two triggers were used for reassembly: pH –dependent and Urea induced reassembly. Horse spleen ferritin (Sigma Aldrich) was used to prepare Apoferritin and was used for encapsulation. The chemical structures of test agents is shown in the Scheme S1.

**Figure S1.** Schematic diagram illustration encapsulation of benzothiazole (Bz) using nanoreactor and reassembly (pH and urea) routes.

**Scheme S1.** Chemical structures of used test agents.

The ChemAxon predictor tool was used to estimate logD profiles for 5F203 and Phortress, see Figure S2, revealing substantial modification in distribution logD (logP at a specific pH) over the wide pH range.

**Figure S2.** ClogP profiles for 5F-203 and Phortress.

SI2 *In vitro* studies

The *in vitro* activity of the test agents was examined by MTT assay. The results for 5F 203 and for Phortress are shown in the Figures S3 and S4, respectively.

**Figure S3:** MTT assay (72hr) dose response curves of 5F 203 & AFt-5F 203 in A) MCF-7, B) MDA-MB-468, C) TK-10, D) IGROV-1, E) HCT 116 and F) MRC-5 cells. Data points are mean ± SD, *n* = 4 in a representative trial, number of independent trials = 3. Inset: Clonogenic assay displaying Survival fractions following 24 exposure treated at GI50 values in corresponding cell lines. Data points are mean ± SD, taken from three independent trials where *n* = 3.

**Figure S4:**MTT assay (72hr) dose response curves of Phortress and AFt encapsulated Phortress in A) MCF-7, B) MDA-MB-468, C) TK-10, D) IGROV-1, E) HCT 116 and F) MRC-5 cells. Data points are mean ± SD, *n* = 4 in a representative trial, with 3 independent trials. Inset: Clonogenic assay displaying Survival fractions following 24 exposure treated at GI50 values in corresponding cell lines. Data points are mean ± SD, taken from independent trials *n* = 3.

TfR1 and GAPDH expression was examined using Bradford assay in lysates prepared from different cell lines (Figure S5). The intensity of the signal of TfR1 in different cell lines is summarised in the Figure S6.

**Figure S5. (A)** TfR1 and **(B)** GAPDH expression in lysates prepared from MCF-7, MDA-468, TK-10, IGROV-1, KM-12, HCC-2998, HCT-116 and MRC-5 cells. Blots from one representative trial are shown, number of independent trials = 3.

**Figure S6**. Summary of TfR1 Signal intensities (TfR1/GAPDH) in MCF-7, MDA-468, TK-10, IGROV-1, KM-12, HCC-2998, HCT-116 and MRC-5 taken from Western Blots. Data points are mean ± SD, from three independent trials
